# Supplementary material for: Performance, morphology and control of power-amplified mandibles in the trap-jaw antMyrmoteras(Hymenoptera: Formicidae)
Source: Oxford University Press journal article supplement (doi:10.1242/jeb.156513), 2017-08-30
Supplement: jeb156513supp.pdf [file jeb156513supp.pdf]

## SUPPLEMENTARY INFORMATION

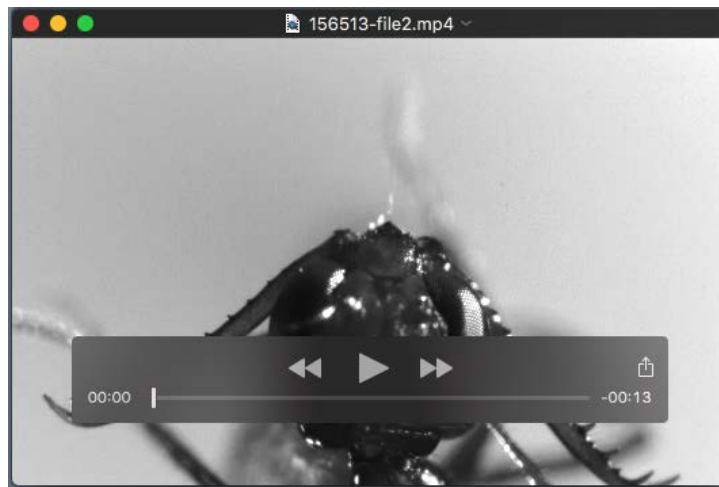

**SUPPLEMENTARY MOVIE 1. High-speed video of *Myrmoteras* mandible strike.** Mandible strike recorded at  $1000 \text{ frames s}^{-1}$  to visualize deformation of the head during the loading phase of a strike.

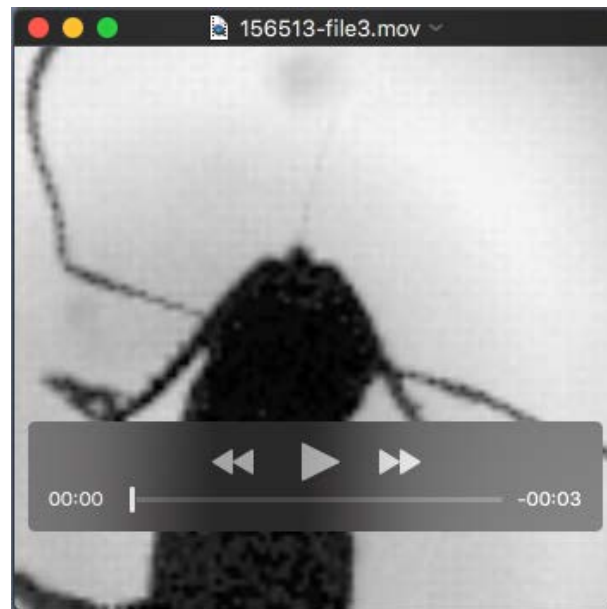

**SUPPLEMENTARY MOVIE 2. High-speed video of *Myrmoteras* mandible strike.** Mandible strike recorded at  $6 \times 10^4 \text{ frames s}^{-1}$  to completely resolve mandible motion during a strike.

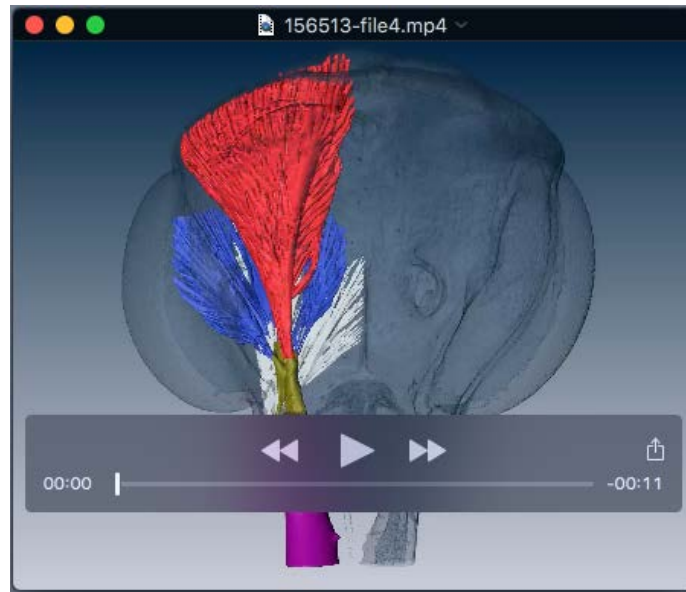

**SUPPLEMENTARY MOVIE 3. Video of surface rendering of mouthpart apparatus in open position.** Surface rendering from microCT data illustrating the special arrangement of the muscles, apodemes and cuticular elements of the mandible apparatus. Colors are as indicated in Fig. 3.

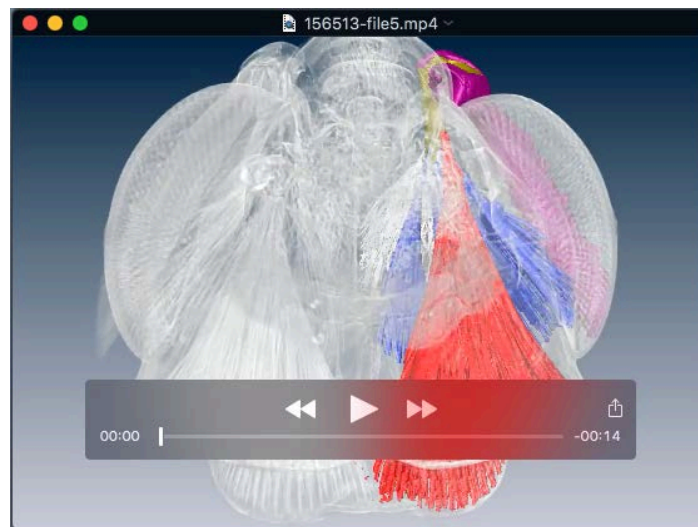

**SUPPLEMENTARY MOVIE 4. Video of surface rendering of mouthpart apparatus in closed position.** Surface rendering from microCT data illustrating the special arrangement of the muscles, apodemes and cuticular elements of the mandible apparatus. Colors are as indicated in Fig. 3.
